# Supplementary material for: Calix[4]arene Derivative for Iodine Capture and Effect on Leaching of Iodine through Packaging
Source: MDPI journal article supplement (doi:10.3390/molecules28041869), 2023-02-16
Supplement: s1 [file s1]

Article

# Calix[4]arene Derivative for Iodine Capture and Effect on Leaching of Iodine through Packaging

Loredana Ferreri <sup>1,†</sup>, Marco Rapisarda <sup>2,†</sup>, Melania Leanza <sup>2</sup>, Cristina Munzone <sup>3</sup>, Nicola D'Antona <sup>1</sup>, Grazia Maria Letizia Consoli <sup>1,\*</sup>, Paola Rizzarelli <sup>2,\*</sup> and Emanuela Teresa Agata Spina <sup>2</sup>

<sup>1</sup> Institute of Biomolecular Chemistry, CNR, Via Paolo Gaifami 18, 95126 Catania, Italy

<sup>2</sup> Institute for Polymers, Composites and Biomaterials, CNR, Via Paolo Gaifami 18, 95126 Catania, Italy

<sup>3</sup> Department of Chemistry, University of Catania, Viale A. Doria 6, 95125 Catania, Italy

\* Correspondence: grazia.consoli@icb.cnr.it (G.M.L.C.); paola.rizzarelli@cnr.it (P.R.); Tel.: +39-0957338319 (G.M.L.C.); +39-0957338236 (P.R.)

† These authors contributed equally to this work.

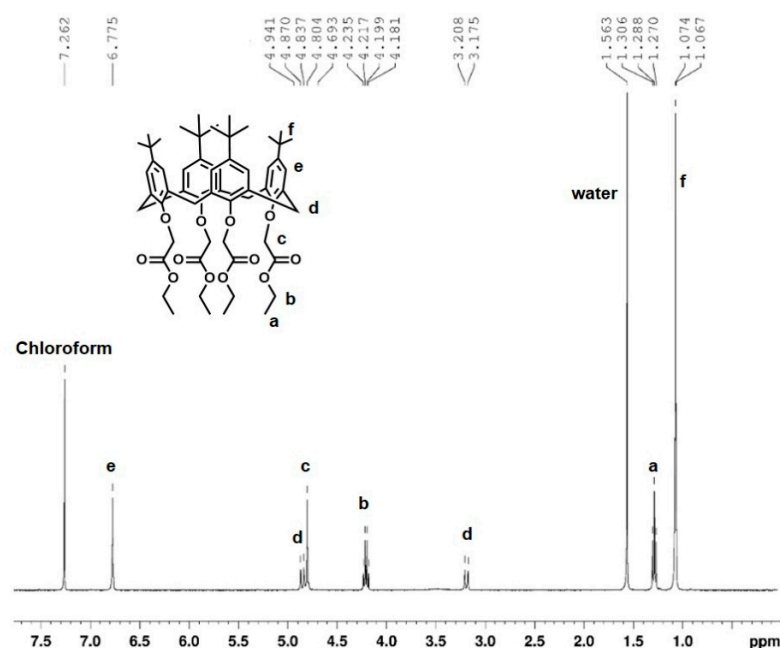

**Figure S1.** <sup>1</sup>H NMR spectrum of the tetra(ethoxycarbonyl-methoxy)-4-tert-butylcalix[4]arene (CX) (400 MHz, CDCl<sub>3</sub>, 297 K).

**Citation:** Ferreri, L.; Rapisarda, M.; Leanza, M.; Munzone, C.; D'Antona, N.; Consoli, G.M.L.; Rizzarelli, P.; Spina, E.T.A. Calix[4]arene Derivative for Iodine Capture and Effect on Leaching of Iodine through Packaging. *Molecules* **2023**, *28*, 1869. <https://doi.org/10.3390/molecules28041869>

Academic Editor: Paula M. Marcos

Received: 02 February 2023

Revised: 13 February 2023

Accepted: 15 February 2023

Published: 16 February 2023

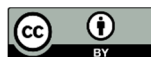

**Copyright:** © 2023 by the authors. Licensee MDPI, Basel, Switzerland. This article is an open access article distributed under the terms and conditions of the Creative Commons Attribution (CC BY) license (<https://creativecommons.org/licenses/by/4.0/>).

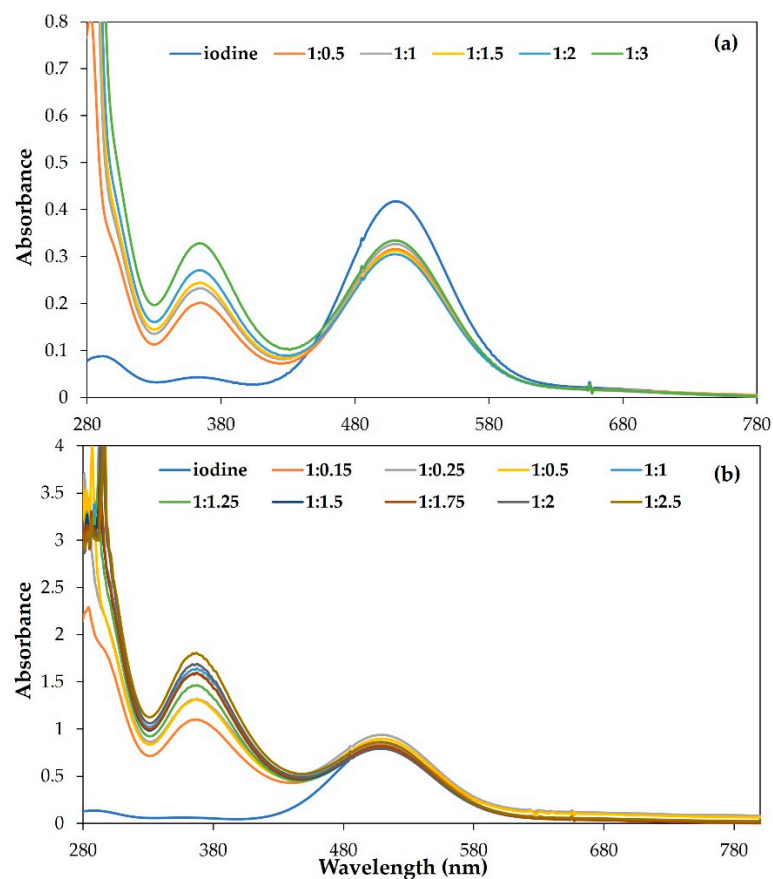

**Figure S2.** UV-vis spectra of iodine  $\text{CHCl}_3$  solution ( $1.3 \times 10^{-3} \text{ M}$ ) in the presence of increasing amounts of CX (from 0 to  $3.9 \times 10^{-3} \text{ M}$ ).

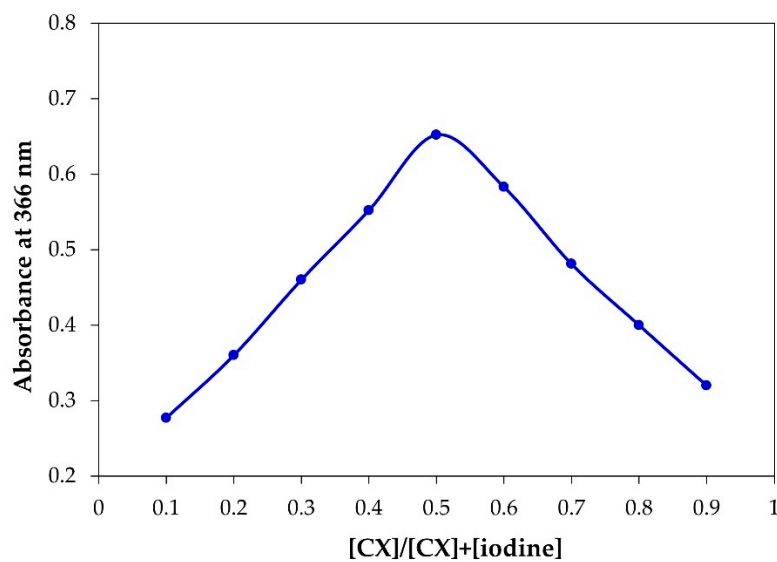

**Figure S3.** Job's plot for the determination of the stoichiometry of the CX/iodine complex.

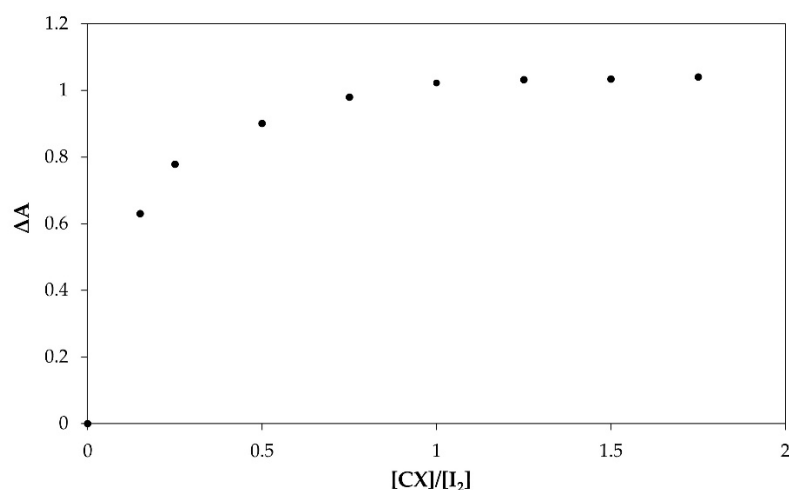

**Figure S4.** Plot of absorbance change versus mole ratio [CX]/[Iodine] at  $\lambda = 366$  nm.

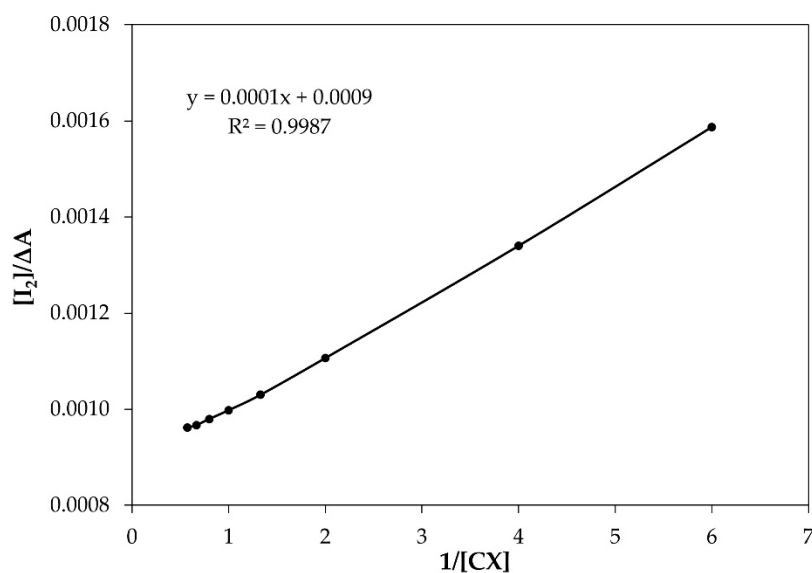

**Figure S5.** Benesi-Hildebrand plot of absorption data for the CX/iodine complex.

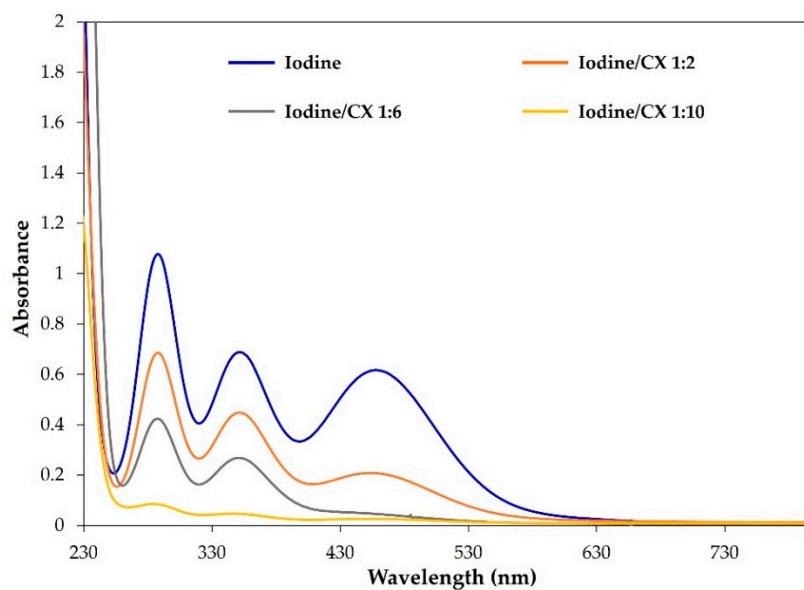

**Figure S6.** UV-vis spectra of iodine in water solution ( $1.3 \times 10^{-3}$  M) alone and after stirring with increasing amounts of CX powder (iodine:CX 1:2, 1:6, and 1:10 molar ratio).

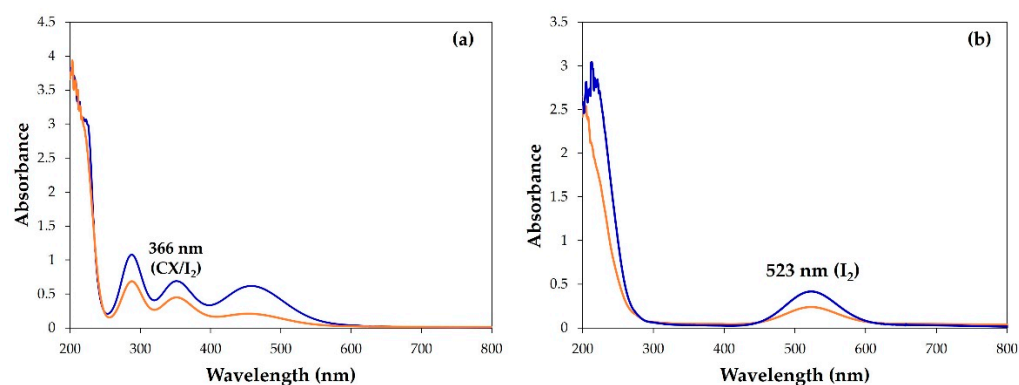

**Figure S7.** UV-vis spectra of (a) iodine in water solution ( $1.3 \times 10^{-3}$  M) before (blue line) and after stirring with CX powder (iodine: CX, 2:1 molar ratio) (orange line); (b) iodine extracted by cyclohexane from the water solution of iodine ( $1.3 \times 10^{-3}$  M) alone (blue line) and after stirring with CX powder (iodine: CX, 2:1 molar ratio) (orange line).

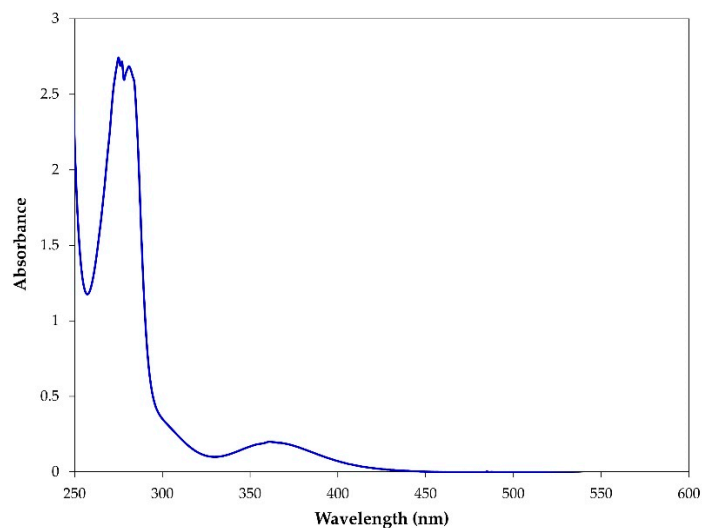

**Figure S8.** UV-vis spectrum in chloroform of the CX/iodine complex from solid-air method.

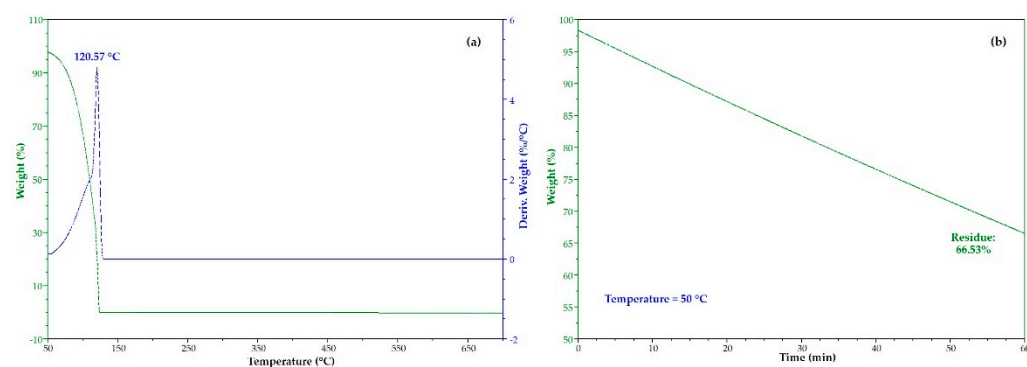

**Figure S9.** (a) TGA and (b) isothermal at 50 °C (60 minute) of I<sub>2</sub> sample.

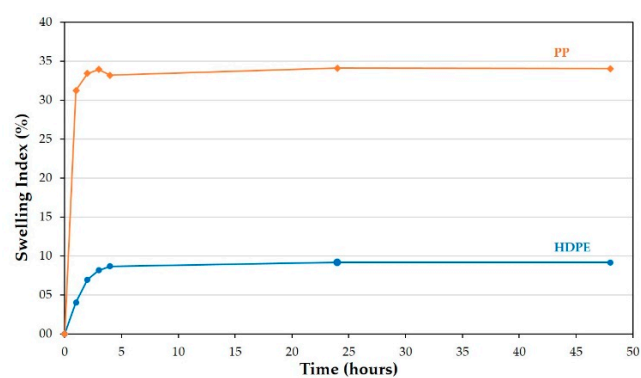

**Figure S10.** Swelling index in  $\text{CHCl}_3$  vs time for HDPE and PP strip samples at room temperature.
